# Supplementary material for: Propagation of alpha-synuclein pathology: hypotheses, discoveries, and yet unresolved questions from experimental and human brain studies
Source: PubMed Central journal article supplement (PMC4698305; doi:10.1007/s00401-015-1485-1), 2015-10-07
Supplement: 401_2015_1485_MOESM3_ESM.pdf [file 401_2015_1485_MOESM3_ESM.pdf]

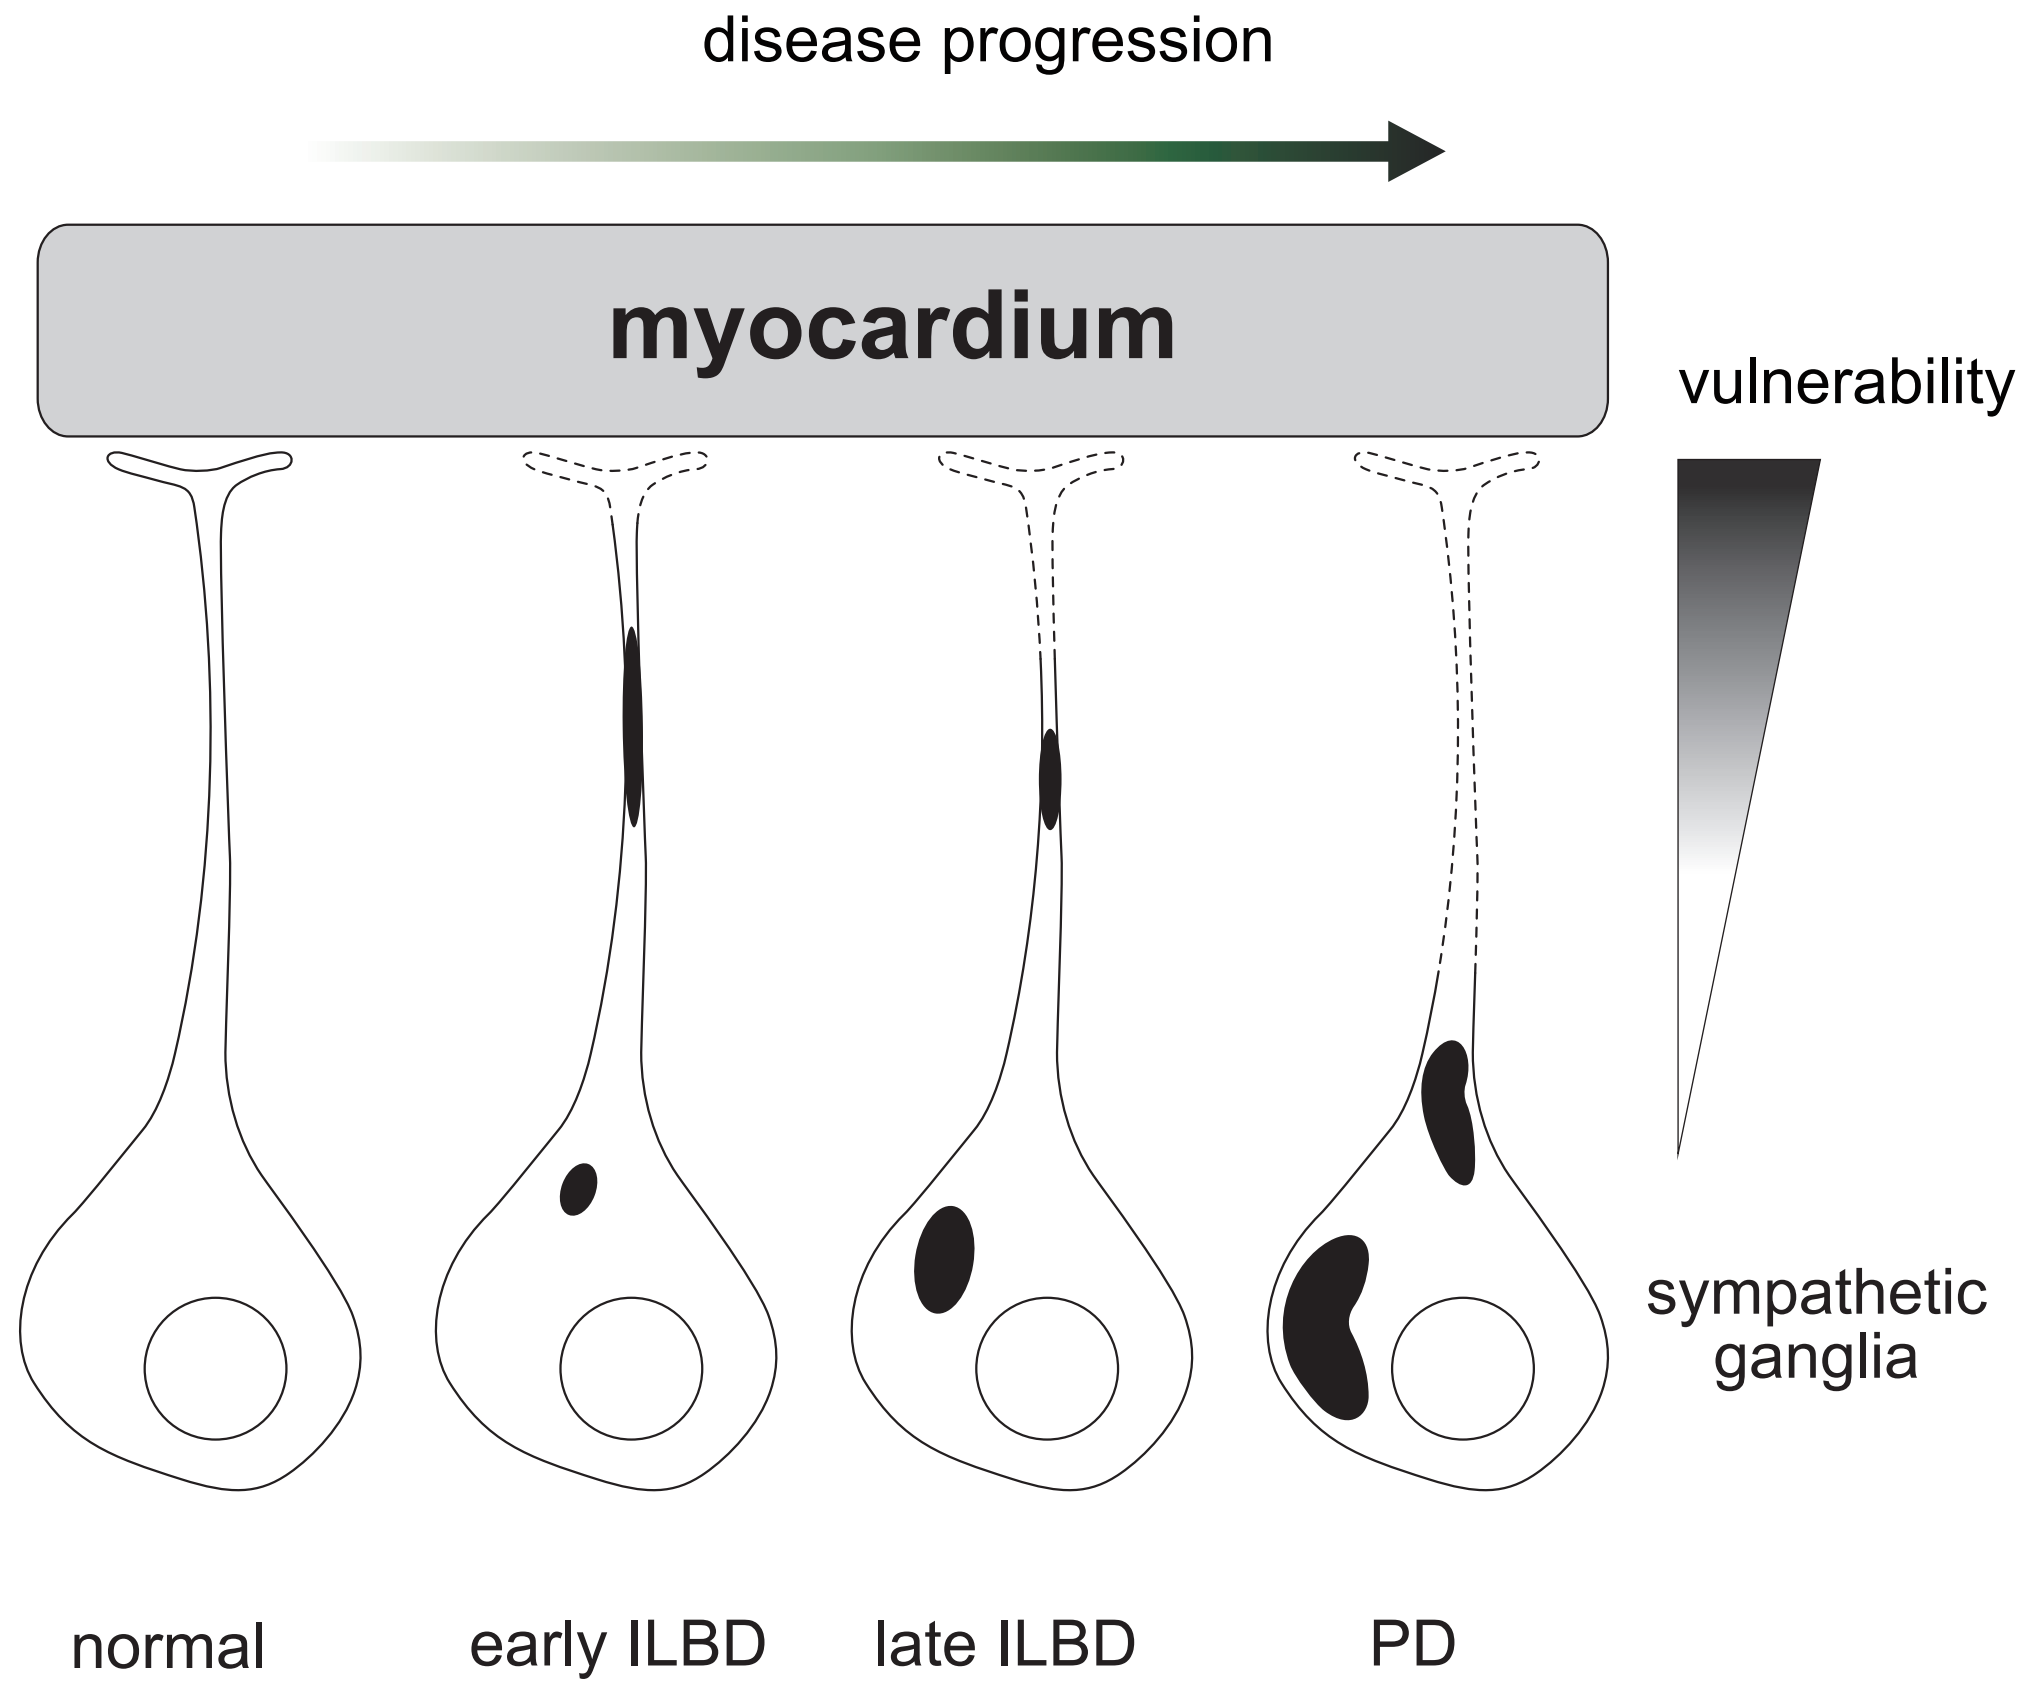

Suppl. Fig 3

**myocardium**

**vu**
